# Supplementary material for: Molecular dynamics study on mechanism of preformed particle gel transporting through nanopores: surface hydration
Source: Royal Society of Chemistry journal article supplement (doi:10.1039/c5ra24282g), 2016-01-01
Supplement: c5ra24282g1.pdf [file c5ra24282g1.pdf]

Supporting Information for

## Molecular Dynamics Study on Mechanism of Preformed Particle Gel

### Transporting through Nanopores: Surface Hydration

Heng Zhang<sup>†</sup>, Ying Ma<sup>†</sup>, Qingquan Hao<sup>‡</sup>, Hua Wang<sup>†</sup>, Gang Liu<sup>†</sup>, Shiling Yuan<sup>\*†</sup>

<sup>†</sup> *School of Chemistry and Chemical Engineering, Shandong University, Jinan 250199, P. R. China*

<sup>‡</sup> *School of Chemical Engineering, East China University of Science and Technology, Shanghai, 200237, P. R. China*

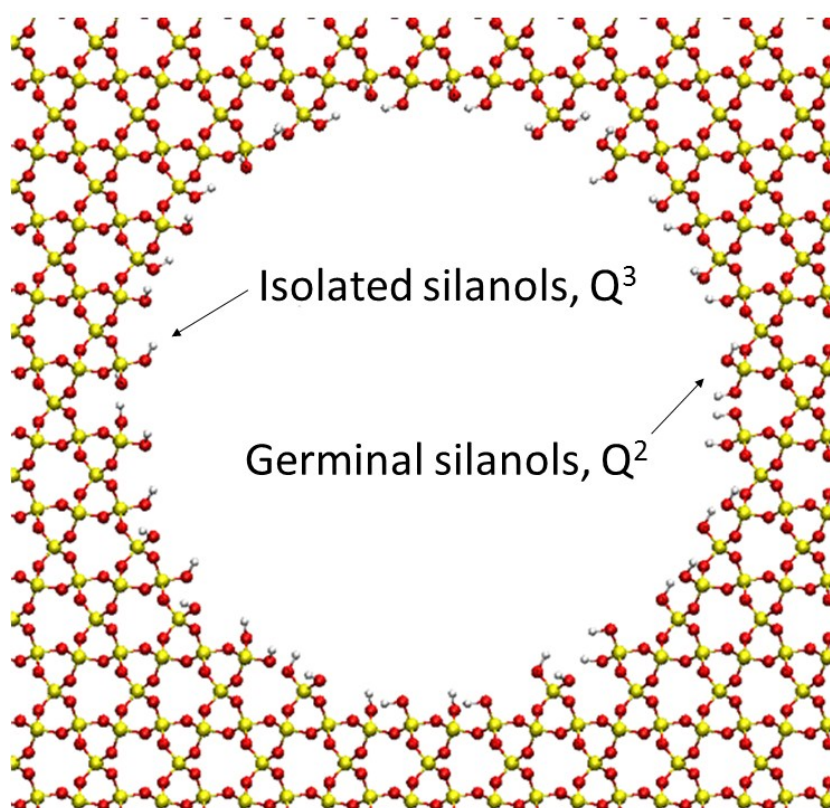

Figure S1. Illustration of the silanol groups inside the silica nanopore with a diameter of 3nm.

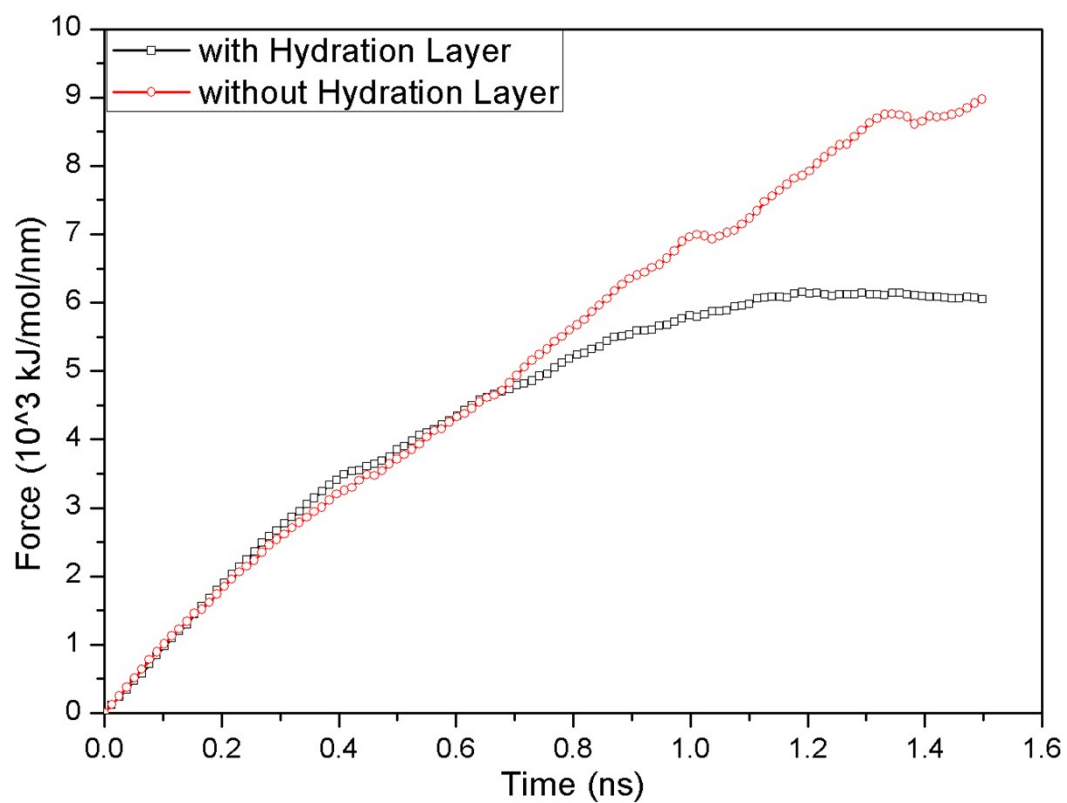

Figure S2. Profile of the external forces extend on the PPG with and without hydration layer.
